# Supplementary material for: Hypertension and frailty: a systematic review and meta-analysis
Source: PubMed Central journal article supplement — BMJ Open. 2018 Dec 28;8(12):e024406. doi: 10.1136/bmjopen-2018-024406 (PMC6318510; doi:10.1136/bmjopen-2018-024406), 2018-12-28
Supplement: bmjopen-2018-024406supp001.pdf [file bmjopen-2018-024406supp001.pdf]

## **Appendix**

### **Search terms used**

#### **Pubmed**

("hypertension"[MeSH Terms] OR "hyperten\*" [Title/Abstract] OR "hypertension" [Title/Abstract] OR "hypertensive" [Title/Abstract] OR "high blood pressure" [Title/Abstract] OR "systolic blood pressure" [Title/Abstract] OR "diastolic blood pressure" [Title/Abstract] OR "raised blood pressure" [Title/Abstract]) AND ("frail elderly" [MeSH Terms] OR "frail\*" [Title/Abstract] OR "frailty" [Title/Abstract])

#### **Web of Science and Embase**

("hyperten\*" OR "hypertension" OR "hypertensive" OR "high blood pressure" OR "systolic blood pressure" OR "diastolic blood pressure" OR "raised blood pressure" ) AND ("frail\*" OR "frailty" )

**Table e1.** Characteristics of the studies included in the systematic review.

| First Author (year)         | Study characteristics                                                                                                                   | n    | Hypertension definition                   | Hypertension prevalence | Frailty definition | Frailty Incidence (longitudinal studies) or prevalence (cross-sectional studies) | % hypertension in frailty groups        | Other results                                                                                                                                                                                                                                                     | NOS |
|-----------------------------|-----------------------------------------------------------------------------------------------------------------------------------------|------|-------------------------------------------|-------------------------|--------------------|----------------------------------------------------------------------------------|-----------------------------------------|-------------------------------------------------------------------------------------------------------------------------------------------------------------------------------------------------------------------------------------------------------------------|-----|
| <b>LONGITUDINAL STUDIES</b> |                                                                                                                                         |      |                                           |                         |                    |                                                                                  |                                         |                                                                                                                                                                                                                                                                   |     |
| Barzilay (2007)             | Country: USA<br>Name: Cardiovascular Health Study (CHS)<br>Setting: community<br>Age: ≥ 65 y                                            | 2826 | BP ≥ 130/85 mm Hg or treated hypertension | 37%                     | CHS criteria       | Prefrail: 66%<br>Frail: 8%                                                       | Robust=34%<br>Prefrail=38%<br>Frail=43% | Incident frailty (5 and 9 y follow-up) was not predicted by hypertension diagnosis or blood pressure levels. SBP at baseline was not independently associated with frailty: HR=0.96 (95% CI 0.89-1.04) for prefrailty and HR=1.01 (95% CI 0.88-1.17) for frailty. | 7   |
| Bouillon (2013)             | Country: UK<br>Name: Whitehall II Study<br>Setting: community<br>Age (range): 45-69 y                                                   | 2707 | BP ≥ 130/85 mm Hg or treated hypertension | 40%                     | CHS criteria       | Prefrail: 37%<br>Frail: 3%                                                       | Robust=38%<br>Prefrail/frail=43%        | -                                                                                                                                                                                                                                                                 | 6   |
| Castrejón-Pérez (2017)      | Country: Mexico<br>Name: Mexican Study of Nutritional and Psychosocial Markers of Frailty<br>Setting: community<br>Age (range): 70-95 y | 237  | Not defined                               | 58%                     | CHS criteria       | Frail=15%                                                                        | Robust=55%<br>Frail=74%                 | At univariate analysis hypertension was associated with incident frailty (HR=2.11, 95%CI 1.03-4.31), but this association was not confirmed in the multivariate analysis (HR=1.58, 95%CI 0.83-3.01)                                                               | 6   |
| Doba (2012)                 | Country: Japan<br>Name: Japanese Health Research Volunteer Study                                                                        | 351  | Not defined                               | 28%                     | FI                 | Frail: 16%                                                                       | Robust=28%<br>Frail=29%                 | Baseline SBP was lower in persons who developed frailty vs non frail SBP=135±17 vs 140±21 (p=0.046) . In multivariate analyses, no                                                                                                                                | 7   |

|                                |                                                                                                                                      |      |                                                    |      |              |                             |                                         |                                                                                                                                                                  |   |
|--------------------------------|--------------------------------------------------------------------------------------------------------------------------------------|------|----------------------------------------------------|------|--------------|-----------------------------|-----------------------------------------|------------------------------------------------------------------------------------------------------------------------------------------------------------------|---|
|                                | Setting: community<br>Age (mean±SD): 78±4 y                                                                                          |      |                                                    |      |              |                             |                                         | significant association between SBP and frailty was observed                                                                                                     |   |
| <b>CROSS-SECTIONAL STUDIES</b> |                                                                                                                                      |      |                                                    |      |              |                             |                                         |                                                                                                                                                                  |   |
| de Albuquerque Sousa (2012)    | Country: Brazil<br>Name: Network of Studies on the Frailty of Elderly Brazilians<br>Setting: Community<br>Age (mean±SD): 74±7 y      | 391  | Self-reported                                      | 58%  | CHS criteria | Prefrail: 60%<br>Frail: 17% | Robust=53%<br>Prefrail=57%<br>Frail=67% | -                                                                                                                                                                | 5 |
| Ávila-Funes (2008)             | Country: France<br>Name: Three-City Study<br>Setting: community<br>Age (mean±SD): 74±5 y                                             | 6078 | Self-reported or BP≥160/95 or treated hypertension | 64%  | CHS criteria | Prefrail: 48%<br>Frail: 7%  | Robust=64%<br>Prefrail=63%<br>Frail=71% | -                                                                                                                                                                | 5 |
| Basile (2017)                  | Country: Italy<br>Setting: community<br>Age (mean): 81±8 y                                                                           | 56   | Treated hypertension                               | 100% | FI           | -                           | -                                       | Participants with SBP≥140 mmHg had lower FI compared to those with SBP<140 mmHg (p=0.006)                                                                        | 5 |
| Bastos-Barbosa (2012)          | Country: Brazil<br>Name: Research Network of Studies of Brazilian Elderly Individuals<br>Setting: community<br>Age (mean±SD): 74±7 y | 77   | BP reported as a continuous measure                | 63%  | CHS criteria | Prefrail: 40%<br>Frail: 30% | Not reported                            | Ambulatory BP of frail group demonstrated significantly higher systolic and diastolic BP values over the 24 h (135/74 mm Hg) than nonfrail group (122/68 mm Hg). | 5 |
| Calado (2016)                  | Country: Brazil<br>Setting: community                                                                                                | 385  | Self-reported                                      | 46%  | CHS criteria | Prefrail: 50%<br>Frail: 9%  | Robust=44%<br>Prefrail=48%<br>Frail=49% | -                                                                                                                                                                | 5 |

|                        |                                                                                                                           |      |                                                    |     |              |                             |                                          |                                                                                                   |   |
|------------------------|---------------------------------------------------------------------------------------------------------------------------|------|----------------------------------------------------|-----|--------------|-----------------------------|------------------------------------------|---------------------------------------------------------------------------------------------------|---|
|                        | Age (mean): 74±6 y                                                                                                        |      |                                                    |     |              |                             |                                          |                                                                                                   |   |
| Castrejón-Pérez (2017) | Country: Mexico<br>Name: Mexican Health and Nutrition Survey<br>Setting: community<br>Age (mean±SD): 71±8 y               | 7164 | Not defined                                        | 38% | FI           | Mean FI score=0.18          | -                                        | Multiple linear regression for FI for hypertension only (without diabetes) Beta: 0.31 (0.55-0.69) | 5 |
| Chang (2014)           | Country: Taiwan<br>Setting: community<br>Age: ≥65 y                                                                       | 234  | Not defined                                        | 43% | CHS criteria | Frail: 39%                  | Robust=33%<br>Frail=58%                  | Hypertension significantly associated with frailty OR=2.21 (1.16–4.21) in multivariate analysis.  | 4 |
| Chung (2016)           | Country: Taiwan<br>Name: I-Lan Longitudinal Aging Study<br>Setting: community<br>Age (mean±SD): 62±9 y                    | 962  | Self-reported or BP≥140/90 or treated hypertension | 37% | CHS criteria | Prefrail: 33%<br>Frail: 3%  | Robust=34%<br>Prefrail=42%<br>Frail=53%  | -                                                                                                 | 6 |
| Fattori (2013)         | Country: Brazil<br>Name: Research Network of Studies of Brazilian Elderly Individuals<br>Setting: community<br>Age: ≥65 y | 900  | BP ≥ 140/90 mm Hg                                  | 52% | CHS criteria | Prefrail: 52%<br>Frail: 8%  | Not reported                             | Hypertension not associated with frailty OR=0.78 (0.60–1.03) in univariate analysis.              | 7 |
| Frisoli (2015)         | Country: Brazil<br>Name: FRAgilidade em idosos com doenças Cardiovasculares<br>Setting: outpatient                        | 172  | Not defined                                        | 84% | CHS criteria | Prefrail: 51%<br>Frail: 38% | Robust=100%<br>Prefrail=83%<br>Frail=81% | -                                                                                                 | 4 |

|                 |                                                                                                                               |      |                                            |     |                                                                                                                                     |                                     |                                                             |                                                                                                                                                                                        |   |
|-----------------|-------------------------------------------------------------------------------------------------------------------------------|------|--------------------------------------------|-----|-------------------------------------------------------------------------------------------------------------------------------------|-------------------------------------|-------------------------------------------------------------|----------------------------------------------------------------------------------------------------------------------------------------------------------------------------------------|---|
|                 | clinic<br>Age (mean±SD):77±6 y                                                                                                |      |                                            |     |                                                                                                                                     |                                     |                                                             |                                                                                                                                                                                        |   |
| Guessous (2014) | Country: Switzerland<br>Name: BusSanté study<br>Setting: community<br>Age (mean): 60 y                                        | 2930 | BP ≥ 140/90 mm Hg or treated hypertension  | 47% | Frailty scale based on 4 indicators (weakness, shrinking, exhaustion, and low activity)                                             | 1 indicator=29%<br>≥2 indicators=8% | 0 indicators =42%<br>1 indicator =54%<br>≥2 indicators =65% | Hypertension significantly associated with frailty indicators in multivariate analyses. OR for 1 indicator (vs. 0 indicators) 1.40 (1.15-2.68)- OR for ≥2 indicators 1.88 (1.32-2.68). | 7 |
| Kang (2017)     | Country: Korea<br>Name: Korea National Health and Nutrition Examination Survey<br>Setting: community<br>Age (mean±SD): 73±5 y | 4352 | BP ≥ 140/90 mm Hg or treated hypertension  | 62% | FI                                                                                                                                  | Prefrail: 39%<br>Frail: 44%         | Robust=49%<br>Prefrail=61%<br>Frail=68%                     | -                                                                                                                                                                                      | 6 |
| Klein (2005)    | Country: USA<br>Name: Beaver Dam Eye Study<br>Setting: community<br>Age (range): 53-86 y                                      | 2515 | BP ≥ 160/95 mm Hg or treated hypertension  | 47% | Frailty scale based on 5 indicators (gait speed, peak expiratory flow rate, hand grip strength, chair stand test and visual acuity) | Not reported                        | -                                                           | In multivariate analysis hypertension significantly associated with frailty scale in men OR for 1-point increment in scale =1.22 (1.00-1.49) and women OR=1.22 (1.02-1.46)             | 6 |
| Lahousse (2014) | Country: The Netherlands<br>Name: Rotterdam Study<br>Setting: community<br>Age (median): 74 y                                 | 2833 | BP ≥ 160/100 mm Hg or treated hypertension | 75% | CHS criteria                                                                                                                        | Prefrail: 51%<br>Frail: 6%          | Robust=71%<br>Prefrail=77%<br>Frail=85%                     | -                                                                                                                                                                                      | 6 |

|                  |                                                                                                                           |      |                                            |     |                                      |                                                                      |                                         |                                                                                                                                                                                                                                                              |   |
|------------------|---------------------------------------------------------------------------------------------------------------------------|------|--------------------------------------------|-----|--------------------------------------|----------------------------------------------------------------------|-----------------------------------------|--------------------------------------------------------------------------------------------------------------------------------------------------------------------------------------------------------------------------------------------------------------|---|
| Lee (2011)       | Country: China<br>Setting: community<br>Age (mean±SD): 72±5 y                                                             | 4000 | Medical records                            | 43% | Composite frailty score (range 0-20) | Mean frailty score=12.2                                              | -                                       | In multivariate analysis hypertension not significantly associated with composite frailty score                                                                                                                                                              | 5 |
| Nadruz 2017)     | Country: USA<br>Name: Atherosclerosis Risk in Communities Study<br>Setting: community<br>Age (mean±SD): 76±5 y            | 3991 | BP ≥ 160/100 mm Hg or treated hypertension | 82% | CHS criteria                         | Frail=5%                                                             | Robust=81%<br>Frail=92%                 | -                                                                                                                                                                                                                                                            | 6 |
| Ng (2014)        | Country: Singapore<br>Name: Singapore Longitudinal Ageing Studies I and II<br>Setting: community<br>Age (mean±SD): 67±8 y | 1685 | Not defined                                | 62% | CHS criteria                         | Prefrail: 42%<br>Frail: 5%                                           | Robust=58%<br>Prefrail=64%<br>Frail=80% | Hypertension not associated with frailty in multivariate analysis (data not provided)                                                                                                                                                                        | 6 |
| O'Connell (2015) | Country: Republic of Ireland<br>Name: Irish Longitudinal Study on Aging<br>Setting: community<br>Age (mean±SD): 63±9 y    | 5692 | BP reported as a continuous measure        | -   | CHS criteria & FI                    | CHS criteria<br>Prefrail: 34%<br>Frail: 4%<br><br>Mean FI score=0.10 | -                                       | In adjusted linear regression analyses, frailty significantly associated with lower seated and standing SBP and DBP. Seated SBP -1.9 (-2.52to-1.27), standing SBP -1.79 (-2.46 to-1-13), seated DBP -1.14 (-1.51to-0.77), standing DBP -1.10 (-1.48to-0.73). | 7 |
| Ramsay (2015)    | Country: UK<br>Name: British Regional Heart Study<br>Setting: community<br>Age (range): 71-92 y                           | 1622 | BP ≥ 160/90 mm Hg or treated hypertension  | 72% | CHS criteria                         | Prefrail: 54%<br>Frail: 19%                                          | Robust=65%<br>Prefrail=74%<br>Frail=78% | Hypertension associated with frailty age-adjusted OR=1.79 (1.27-2.54)                                                                                                                                                                                        | 6 |

|                      |                                                                                                                         |        |                                                                                |                                                                  |              |                                                                                      |                                                                                    |                                                                                                                                                                                                                                                |   |
|----------------------|-------------------------------------------------------------------------------------------------------------------------|--------|--------------------------------------------------------------------------------|------------------------------------------------------------------|--------------|--------------------------------------------------------------------------------------|------------------------------------------------------------------------------------|------------------------------------------------------------------------------------------------------------------------------------------------------------------------------------------------------------------------------------------------|---|
| Ravindrarahaj (2017) | Country: UK<br>Name: Clinical Practice Research Datalink<br>Setting: community<br>Age: ≥80 y                            | 144403 | SBP values classified as follows (mmHg): <110, 110-119, 120-139, 140-159, ≥160 | <110 =3%<br>110-119=7%<br>120-139=37%<br>140-159=41%<br>≥160=12% | FI           | Mild frailty=40%<br>Moderate frailty=21%<br>Severe frailty=7%<br><br>Any frailty=68% | Any frailty:<br><110 =78%<br>110-119=77%<br>120-139=72%<br>140-159=64%<br>≥160=58% | Frailty was associated with lower BP. In participants with SBP <110 mmHg, 22% were fit, 28% had moderate frailty, and 12% had severe frailty. In those with SBP ≥160 mm Hg, 42% were fit, 16% had moderate frailty, and 4% had severe frailty. | 7 |
| Ricci (2014)         | Country: Brazil<br>Name: Fragilidade em Idosos Brasileiros Network Study<br>Setting: community<br>Age (mean±SD): 72±6 y | 761    | Self-reported or BP≥140/90 or treated hypertension                             | 84%                                                              | CHS criteria | Prefrail: 48%<br>Frail: 10%                                                          | Robust=81%<br>Prefrail=87%<br>Frail=84%                                            | -                                                                                                                                                                                                                                              | 5 |
| Serra-Prat (2016)    | Country: Spain,<br>Setting: community<br>Age (mean±SD): 80±3 y                                                          | 324    | Not defined                                                                    | 71%                                                              | CHS criteria | Prefrail: 54%<br>Frail: 14%                                                          | Robust=66%<br>Prefrail=70%<br>Frail=82%                                            | Hypertension associated with frailty OR=2.24 (1.00-4.99) at univariate analysis. Association not confirmed in multivariate analysis (data not provided).                                                                                       | 5 |
| Tavares (2016)       | Country: Brazil<br>Name: Study of Frailty in Elderly People<br>Setting: hospital<br>Age: ≥ 60 y                         | 205    | Self-reported                                                                  | 66%                                                              | CHS criteria | Prefrail: 52%<br>Frail: 26%                                                          | Robust=62%<br>Prefrail=62%<br>Frail=76%                                            | -                                                                                                                                                                                                                                              | 4 |
| Vaingankar (2016)    | Country: Singapore<br>Name: Well-being of the Singapore Elderly study<br>Setting: community<br>Age (mean): 69 y         | 2102   | Not defined                                                                    | 59%                                                              | CHS criteria | Prefrail: 40%<br>Frail: 6%                                                           | Robust=55%<br>Prefrail=62%<br>Frail=70%                                            | Hypertension not associated with frailty in multivariate analysis (data not provided)                                                                                                                                                          | 4 |

|                 |                                                                                                                 |      |                                     |       |                        |                             |                                         |                                                                                                                           |   |
|-----------------|-----------------------------------------------------------------------------------------------------------------|------|-------------------------------------|-------|------------------------|-----------------------------|-----------------------------------------|---------------------------------------------------------------------------------------------------------------------------|---|
| Watanabe (2017) | Country: Japan<br>Name: Obu Study of Health Promotion for the Elderly<br>Setting: community<br>Age (mean): 71 y | 4720 | Self reported                       | 46%   | CHS criteria           | Prefrail: 57%<br>Frail: 11% | Robust=39%<br>Prefrail=47%<br>Frail=55% | Hypertension significantly associated with frailty in multivariate analysis (OR 1.43, 95% CI = 1.14–1.78)                 | 4 |
| Wong (2010)     | Country: Canada,<br>Name: Montreal Unmet Needs Study<br>Setting: community<br>Age (mean±SD): 80±4 y             | 740  | Self-reported                       | 52.3% | CHS criteria           | Prefrail: 50%<br>Frail: 7%  | Robust=47%<br>Prefrail=55%<br>Frail=60% | -                                                                                                                         | 5 |
| Wu (2009)       | Country: Taiwan<br>Setting: community and hospital<br>Age (mean±SD): 77±6 y                                     | 90   | Not defined                         | 58%   | CHS criteria           | Prefrail: 62%<br>Frail: 23% | Robust=69%<br>Prefrail=48%<br>Frail=76% | No significant association between frailty and hypertension at univariate analysis, OR=1.23 (0.76–1.98)                   | 4 |
| Yanagita (2017) | Country: Japan<br>Setting: hospital<br>Age (mean±SD): 78±8 y                                                    | 132  | BP reported as a continuous measure | -     | Clinical Frailty Scale | Frail=42%                   | -                                       | Frail participants had lower SBP values. In multivariate analyses frailty associated with significantly lower SBP values. | 4 |

NOS = Newcastle-Ottawa Scale; CHS = Cardiovascular Health Study; OR = Odds Ratio; FI = Frailty Index; BP=Blood Pressure; SBP=Systolic Blood Pressure; DBP=Diastolic Blood Pressure
